# Supplementary material for: Malnutrition and Food Insecurity Might Pose a Double Burden for Older Adults
Source: Nutrients. 2020 Aug 11;12(8):2407. doi: 10.3390/nu12082407 (PMC7468760; doi:10.3390/nu12082407)
Supplement: Supplementary file 1 [file nutrients-12-02407-s001.pdf]

## Supplementary Material:

# Malnutrition and food insecurity pose a double burden for older adults

Konstantinos Gkiouras, Stavros Cheristanidis, Theopoula D. Papailia, Maria G. Grammatikopoulou, Nikolaos Karamitsios, Dimitrios G. Goulis and Theodora Papamitsou

**Table S1.** Sensitivity analysis: multiple logistic assessment of well-nourished ( $n=36$ ) versus malnutrition risk ( $n=85$ ) participants.

| Variable                                | ML1  |            |         | ML2  |            |         |
|-----------------------------------------|------|------------|---------|------|------------|---------|
|                                         | OR   | 95% CI     | p-value | OR   | 95% CI     | p-value |
| Men                                     | 0.87 | 0.36–2.09  | 0.748   | 0.90 | 0.38–2.14  | 0.811   |
| Not-married (single/widower/divorced)   | 0.71 | 0.26–1.89  | 0.487   | -    | -          | -       |
| Paying off a loan                       | 1.30 | 0.37–4.60  | 0.680   | -    | -          | -       |
| Often/Rare Treatment adherence          | 1.05 | 0.36–3.02  | 0.935   | -    | -          | -       |
| Visits in primary health care > 1/month | 2.33 | 0.25–21.72 | 0.458   | -    | -          | -       |
| Food insecurity                         | 4.45 | 1.77–11.18 | 0.001   | 4.87 | 1.97–12.06 | 0.001   |

CI, confidence intervals; ML1, multiple logistic model 1; ML2, multiple logistic model 2; OR, odds ratio. ML1 and ML2 performed as a sensitivity analysis examining the reciprocal relationship between malnutrition risk (dependent variable) and food insecurity (independent variable) while including the same set of covariates presented in Table 2.
